# Supplementary material for: A functional assay for the clinical annotation of genetic variants of uncertain significance in Diamond–Blackfan anemia
Source: Hum Mutat. 2018 May 28;39(8):1102–11. doi: 10.1002/humu.23551 (PMC6055729; doi:10.1002/humu.23551)
Supplement: Supplementary file 1 — SUPPLEMENTARY MATERIAL [file HUMU-39-1102-s001.pdf]

## SUPPLEMENTARY MATERIAL

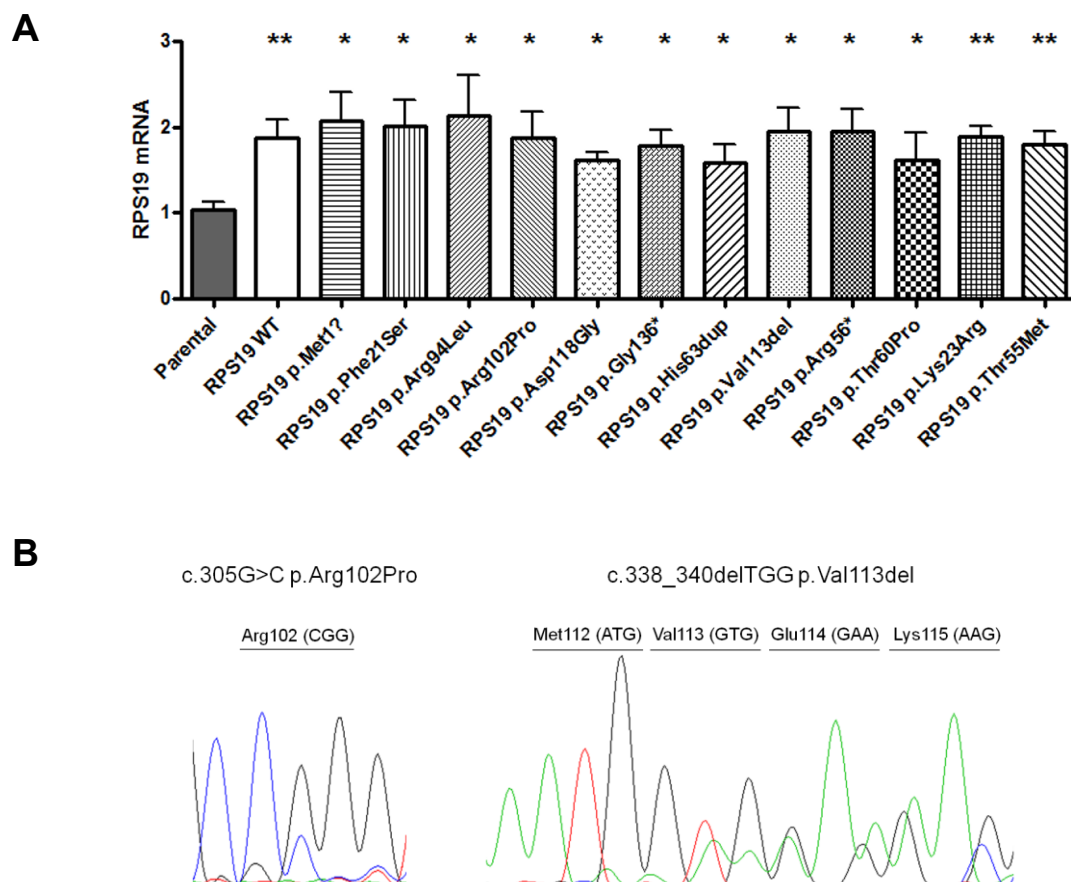

**Supplementary Figure S1.** *RPS19* transcript in patient cells expressing wild-type or mutant exogenous *RPS19*. **(A)** The level of *RPS19* transcript measured by quantitative RT-PCR was increased after transduction with *RPS19* transgenes. Asterisks represent statistically significant differences between parental cells and cells expressing exogenous *RPS19*: \*  $p < 0.05$ ; \*\*  $p < 0.01$ . Results obtained from P1 and P2 patient cells were considered biological replicates. Error bars represent standard error of the mean. **(B)** Sanger sequencing performed on cDNA demonstrated the presence of each mutation in *RPS19* transcript. Representative electropherograms of cDNA obtained from cells expressing mutants c.305G>C p.Arg102Pro and c.338\_340delTGG p.Val113del are shown.

**Supplementary Table S1.** VUS in *RPS19* identified in DBA patients.

| ID | DNA change    | Protein change      | Mutation Taster                                | Mutation Assessor  | Polyphen-2                    | PROVEAN                  | SIFT                | Condel                        | Affected patients | Functional studies                                 | Pathogenic according to functional studies |
|----|---------------|---------------------|------------------------------------------------|--------------------|-------------------------------|--------------------------|---------------------|-------------------------------|-------------------|----------------------------------------------------|--------------------------------------------|
| 1  | c.1A>G        | p.Met1?             | Disease causing M1? initiating Methionine lost | na                 | Probably damaging score 1     | Neutral score -2.491     | Damaging score 0    | Probably damaging score 0.577 | 5                 | Chatr-Aryamontri et al (2004); Badhai et al (2009) | yes (this work)                            |
| 2  | c.2T>A        | p.Met1?             | Disease causing M1? initiating Methionine lost | na                 | Probably damaging score 1     | Deleterious score -3.618 | Damaging score 0    | Probably damaging score 0.582 | 1                 | /                                                  | /                                          |
| 3  | c.3G>A        | p.Met1?             | Disease causing M1? initiating Methionine lost | na                 | Probably damaging score 1     | Deleterious score -2.526 | Damaging score 0    | Probably damaging score 0.577 | 9                 | Chae et al (2014)                                  | yes                                        |
| 4  | c.3G>C        | p.Met1?             | Disease causing M1? initiating Methionine lost | na                 | Probably damaging score 1     | Deleterious score -2.526 | Damaging score 0    | Probably damaging score 0.577 | 1                 | /                                                  | /                                          |
| 5  | c.3G>T        | p.Met1?             | Disease causing M1? initiating Methionine lost | na                 | Probably damaging score 1     | Deleterious score -2.526 | Damaging score 0    | Probably damaging score 0.577 | 9                 | /                                                  | /                                          |
| 6  | c.26T>A       | p.Val9Glu           | Disease causing score 121                      | High score 3.84    | Probably damaging score 0.996 | Deleterious score -6.395 | Damaging score 0    | Probably damaging score 0.828 | 1                 | /                                                  | /                                          |
| 7  | c.43G>T       | p.Val15Phe          | Disease causing score 50                       | Medium score 3.395 | Probably damaging score 0.997 | Deleterious score -3.937 | Damaging score 0    | Probably damaging score 0.690 | 2                 | Angelini et al (2007); Da Costa et al (2003)       | yes                                        |
| 8  | c.49G>C       | p.Ala17Pro          | Disease causing score 27                       | Medium score 2.845 | Probably damaging score 0.999 | Deleterious score -4.048 | Damaging score 0.01 | Probably damaging score 0.719 | 3                 | /                                                  | /                                          |
| 9  | c.53T>C       | p.Leu18Pro          | Disease causing score 98                       | Medium score 3.265 | Probably damaging score 0.997 | Deleterious score -5.270 | Damaging score 0    | Probably damaging score 0.772 | 1                 | Angelini et al (2007)                              | yes                                        |
| 10 | c.53T>G       | p.Leu18Arg          | Disease causing score 102                      | Medium score 3.265 | Probably damaging score 0.990 | Deleterious score -4.619 | Damaging score 0    | Probably damaging score 0.772 | 1                 | /                                                  | /                                          |
| 11 | c.53_54insAGA | p.Leu18_Ala19insGlu | Disease causing                                | na                 | na                            | Deleterious score -9.224 | na                  | na                            | 1                 | Angelini et al (2007)                              | yes                                        |

|    |          |            |                              |                       |                                     |                              |                         |                                     |   |                                                                           |                 |
|----|----------|------------|------------------------------|-----------------------|-------------------------------------|------------------------------|-------------------------|-------------------------------------|---|---------------------------------------------------------------------------|-----------------|
| 12 | c.58G>C  | p.Ala20Pro | Disease causing<br>score 27  | Medium<br>score 3.43  | Probably<br>damaging<br>score 0.996 | Deleterious<br>score -4.059  | Damaging<br>score 0.03  | Probably<br>damaging<br>score 0.778 | 1 | /                                                                         | /               |
| 13 | c.62T>C  | p.Phe21Ser | Disease causing<br>score 155 | Medium<br>score 2.44  | Probably<br>damaging<br>score 0.969 | Deleterious<br>score -6.578  | Tolerated<br>score 0.07 | Probably<br>damaging<br>score 0.780 | 1 | /                                                                         | yes (this work) |
| 14 | c.83T>G  | p.Leu28Arg | Disease causing<br>score 102 | Medium<br>score 3.365 | Probably<br>damaging<br>score 0.983 | Deleterious<br>score -4.487  | Damaging<br>score 0     | Probably<br>damaging<br>score 0.767 | 1 | /                                                                         | /               |
| 15 | c.114G>C | p.Lys38Asn | Disease causing<br>score 94  | High<br>score 3.93    | Probably<br>damaging<br>score 0.999 | Deleterious<br>score -4.257  | Damaging<br>score 0     | Probably<br>damaging<br>score 0.836 | 1 | /                                                                         | /               |
| 16 | c.140C>T | p.Pro47Leu | Disease causing<br>score 98  | High<br>score 3.89    | Possibly<br>damaging<br>score 0.945 | Deleterious<br>score -8.823  | Damaging<br>score 0.01  | Probably<br>damaging<br>score 0.832 | 2 | Angelini et al (2007);<br>Idol et al (2007)                               | yes             |
| 17 | c.154T>C | p.Trp52Arg | Disease causing<br>score 101 | High<br>score 3.925   | Probably<br>damaging<br>score 0.999 | Deleterious<br>score -13.176 | Damaging<br>score 0     | Probably<br>damaging<br>score 0.834 | 2 | Angelini et al (2007)                                                     | yes             |
| 18 | c.156G>C | p.Trp52Cys | Disease causing<br>score 215 | High<br>score 3.925   | Probably<br>damaging<br>score 1     | Deleterious<br>score -12.234 | Damaging<br>score 0     | Probably<br>damaging<br>score 0.834 | 2 | /                                                                         | /               |
| 19 | c.167G>A | p.Arg56Gln | Disease causing<br>score 43  | High<br>score 3.835   | Possibly<br>damaging<br>score 0.900 | Deleterious<br>score -3.468  | Damaging<br>score 0.01  | Probably<br>damaging<br>score 0.749 | 9 | Angelini et al (2007); Da<br>Costa et al (2003);<br>Cmejlova et al (2006) | yes             |
| 20 | c.167G>C | p.Arg56Pro | Disease causing<br>score 103 | High<br>score 3.835   | Probably<br>damaging<br>score 1     | Deleterious<br>score -6.360  | Damaging<br>score 0.01  | Probably<br>damaging<br>score 0.818 | 2 | /                                                                         | /               |
| 21 | c.169G>C | p.Ala57Pro | Disease causing<br>score 27  | High<br>score 3.54    | Probably<br>damaging<br>score 0.985 | Deleterious<br>score -3.807  | Damaging<br>score 0     | Probably<br>damaging<br>score 0.789 | 1 | Angelini et al (2007)                                                     | yes             |
| 22 | c.172G>C | p.Ala58Pro | Disease causing<br>score 27  | High<br>score 3.89    | Probably<br>damaging<br>score 1     | Deleterious<br>score -4.721  | Damaging<br>score 0     | Probably<br>damaging<br>score 0.831 | 1 | /                                                                         | /               |
| 23 | c.176C>T | p.Ser59Phe | Disease causing<br>score 155 | High<br>score 3.695   | Probably<br>damaging<br>score 1     | Deleterious<br>score -5.247  | Damaging<br>score 0     | Probably<br>damaging<br>score 0.811 | 1 | /                                                                         | /               |
| 24 | c.178A>C | p.Thr60Pro | Disease causing<br>score 38  | Medium<br>score 2.555 | Probably<br>damaging<br>score 0.984 | Deleterious<br>score -3.474  | Damaging<br>score 0     | Probably<br>damaging<br>score 0.676 | 1 | /                                                                         | /               |

|    |                 |             |                           |                    |                               |                          |                      |                               |    |                                                                      |                 |
|----|-----------------|-------------|---------------------------|--------------------|-------------------------------|--------------------------|----------------------|-------------------------------|----|----------------------------------------------------------------------|-----------------|
| 25 | c.182C>A        | p.Ala61Glu  | Disease causing score 107 | Medium score 3.35  | Probably damaging score 0.969 | Deleterious score -3.790 | Damaging score 0.02  | Probably damaging score 0.675 | 1  | Angelini et al (2007)                                                | yes             |
| 26 | c.184C>T        | p.Arg62Trp  | Disease causing score 101 | High score 3.89    | Probably damaging score 0.987 | Deleterious score -7.487 | Damaging score 0.02  | Probably damaging score 0.825 | 18 | Angelini et al (2007); Da Costa et al (2003); Hamaguchi et al (2002) | yes             |
| 27 | c.185G>A        | p.Arg62Gln  | Disease causing score 43  | High score 3,89    | Possibly damaging score 0.817 | Deleterious score -3.762 | Damaging score 0.01  | Probably damaging score 0.723 | 17 | Angelini et al (2007); Choesmel et al (2007)                         | yes             |
| 28 | c.187_189insCAC | p.His63dup  | Disease causing           | na                 | na                            | Deleterious score -9.127 | na                   | na                            | 1  | /                                                                    | yes (this work) |
| 29 | c.191T>C        | p.Leu64Pro  | Disease causing score 98  | Medium score 3.45  | Probably damaging score 1     | Deleterious score -6.137 | Damaging score 0     | Probably damaging score 0.788 | 1  | /                                                                    | /               |
| 30 | c.212G>A        | p.Gly71Glu  | Disease causing score 98  | High score 3.885   | Probably damaging score 1     | Deleterious score -7.264 | Damaging score 0     | Probably damaging score 0.824 | 1  | /                                                                    | /               |
| 31 | c.226A>C        | p.Thr76Pro  | Disease causing score 38  | Medium score 2.93  | Possibly damaging score 0.728 | Deleterious score -3.760 | Damaging score 0.04  | Probably damaging score 0.750 | 1  | /                                                                    | /               |
| 32 | c.281G>T        | p.Arg94Leu  | Polymorphism score 102    | Medium score 2.05  | Benign score 0.006            | Deleterious score -3.850 | Tolerated score 0.25 | Probably damaging score 0.610 | 1  | /                                                                    | no (this work)  |
| 33 | c.284G>T        | p.Gly95Val  | Disease causing score 109 | Medium score 2.95  | Possibly damaging score 0.741 | Deleterious score -5.142 | Damaging score 0.02  | Probably damaging score 0.781 | 1  | /                                                                    | /               |
| 34 | c.301C>T        | p.Arg101Cys | Disease causing score 180 | Medium score 3.08  | Possibly damaging score 0.888 | Deleterious score -6.340 | Damaging score 0.01  | Probably damaging score 0.721 | 1  | /                                                                    | /               |
| 35 | c.302G>A        | p.Arg101His | Disease causing score 29  | Medium score 2.455 | Possibly damaging score 0.576 | Deleterious score -4.091 | Damaging score 0.04  | Probably damaging score 0.673 | 7  | Angelini et al (2007); Gazda et al (2004)                            | yes             |
| 36 | c.305G>C        | p.Arg102Pro | Disease causing score 103 | Medium score 2.11  | Benign score 0.001            | Deleterious score -3.590 | Damaging score 0.02  | Probably damaging score 0.593 | 1  | /                                                                    | yes (this work) |
| 37 | c.320T>G        | p.Leu107Arg | Disease causing score 102 | Medium score 3.19  | Probably damaging score 0.969 | Deleterious score -5.882 | Damaging score 0.01  | Probably damaging score 0.837 | 1  | /                                                                    | /               |

|    |                 |             |                              |                      |                                     |                              |                         |                                     |   |                                                 |                 |
|----|-----------------|-------------|------------------------------|----------------------|-------------------------------------|------------------------------|-------------------------|-------------------------------------|---|-------------------------------------------------|-----------------|
| 38 | c.353A>G        | p.Asp118Gly | Disease causing<br>score 94  | Low<br>score 1.29    | Benign<br>score 0.045               | Deleterious<br>score -2.577  | Tolerated<br>score 0.21 | Probably<br>damaging<br>score 0.603 | 1 | /                                               | yes (this work) |
| 39 | c.358G>A        | p.Gly120Ser | Disease causing<br>score 56  | High<br>score 3.885  | Probably<br>damaging<br>score 1.000 | Deleterious<br>score -5.867  | Damaging<br>score 0.02  | Probably<br>damaging<br>score 0.796 | 1 | /                                               | /               |
| 40 | c.376C>T        | p.Gln126*   | Disease causing              | na                   | na                                  | na                           | na                      | na                                  | 2 | /                                               | /               |
| 41 | c.380G>A        | p.Gly127Glu | Disease causing<br>score 98  | Medium<br>score 2.73 | Probably<br>damaging<br>score 0.988 | Deleterious<br>score -7.117  | Damaging<br>score 0.02  | Probably<br>damaging<br>score 0.762 | 1 | Angelini et al (2007); Da<br>Costa et al (2003) | yes             |
| 42 | c.382C>T        | p.Gln128*   | Disease causing              | na                   | na                                  | na                           | na                      | na                                  | 1 | /                                               | /               |
| 43 | c.392T>C        | p.Leu131Pro | Disease causing<br>score 98  | High<br>score 3.77   | Probably<br>damaging<br>score 1     | Deleterious<br>score -6.320  | Damaging<br>score 0     | Probably<br>damaging<br>score 0.792 | 1 | /                                               | /               |
| 44 | c.392T>G        | p.Leu131Arg | Disease causing<br>score 102 | High<br>score 3.77   | Possibly<br>damaging<br>score 0.938 | Deleterious<br>score -5.429  | Damaging<br>score 0.01  | Probably<br>damaging<br>score 0.826 | 2 | /                                               | /               |
| 45 | c.403G>A        | p.Ala135Thr | Disease causing<br>score 58  | High<br>score 3.84   | Possibly<br>damaging<br>score 0.949 | Deleterious<br>score -3.497  | Damaging<br>score 0.02  | Probably<br>damaging<br>score 0.815 | 1 | /                                               | /               |
| 46 | c.406G>T        | p.Gly136*   | Disease causing              | na                   | na                                  | na                           | na                      | na                                  | 1 | /                                               | yes (this work) |
| 47 | c.338_340delTGG | p.Val113del | Disease causing              | na                   | na                                  | Deleterious<br>score -13.503 | na                      | na                                  | 1 | /                                               | yes (this work) |

na: not available. RefSeq: NM\_001022.3, NP\_001013.1.

Mutation Taster: the score for amino acid substitutions reflects the physicochemical difference between the original and the mutated amino acid but does not influence the prediction. Mutation Assessor: the Functional Impact score is reported. PROVEAN: a score equal to or below the predefined threshold (-2.5) predicts a deleterious effect for the protein variant; a score above the threshold indicates that the variant is predicted to have a neutral effect. SIFT: the score predicts whether an amino acid substitution affects protein function, and ranges from 0.0 (deleterious) to 1.0 (tolerated).

Websites and software versions are shown in the Method section.
